# Supplementary material
Source: PubMed Central journal article supplement (PMC7899235)

# SUPPLEMENTARY MATERIAL

## TABLE OF CONTENTS

|                                                           |                      |
|-----------------------------------------------------------|----------------------|
| <b>SUPPLEMENTARY MATERIALS AND METHODS EXTENDED .....</b> | <b>2</b>             |
| <b>SUPPLEMENTARY FIGURES .....</b>                        | <b>6</b>             |
| <i>SUPPLEMENTARY FIGURE 1</i> .....                       | 6                    |
| <i>SUPPLEMENTARY FIGURE 2</i> .....                       | 7                    |
| <i>SUPPLEMENTARY FIGURE 3</i> .....                       | 8                    |
| <b>SUPPLEMENTARY TABLE 1 .....</b>                        | <b>APPENDIX .XLS</b> |

## Supplementary Materials and Methods - Extended

### Methods

**Clinical Study:** Twelve healthy donor volunteers were enrolled at the Hoxworth Blood Center under FDA Investigational New Drug application and Institutional Review Board approved protocol of the University of Cincinnati number 2017-6190 and in conformity with the Declaration of Helsinki. Each subject donated two units within a minimum of 8 weeks following FDA and AABB regulations. Both units were processed to obtain log4 leukocyte-filtered RBC products (Haemonetics, Braintree, MA), which were randomized to be stored either under standard conditions in CP2D/AS-3, or under hypoxic storage at controlled  $SO_2 < 20\%$ . Deoxygenation of the units was performed through proprietary Hemanext Inc. technology and workflows, as extensively described.<sup>1-3</sup> At completion of the two-arm cross-sectional study, 24 units were thus stored under standard (n=12) or hypoxic conditions (n=12) for up to 42 days, with each donor being their own control. Each unit was sterilely docked and sampled at storage day 0, 21 and 42 for metabolomics analyses,  $SO_2$ ,  $pO_2$ ,  $pCO_2$ , hemolysis, pH, ATP, 2,3-DPG and lactate measurements, as previously described<sup>4</sup>. Metabolomics and lipidomics analyses were performed on RBC and supernatants from these units, separated via centrifugation for 10 min at 4°C at 1,500 g.

**Determination of post-transfusion recovery via  $^{51}Cr$  labeling:** Autologous in vivo post-transfusion recovery studies were performed at Hoxworth Blood Center, as previously described.<sup>5</sup> On days 42, each unit was inspected for any signs of unusual hemolysis or discoloration indicative of bacterial growth. The unit was well mixed by hand (1 min), and approximately 15 mL of the RBCs removed and labeled with approximately 15 $\mu$ Ci of chromium-51 ( $^{51}Cr$ ) with standard techniques.<sup>5</sup> The labeling agent,  $^{51}Cr$  sodium chromate, was mixed aseptically with the RBCs at roomtemperature for 30 minutes. One double-volume saline wash was conducted. An aliquot of the final volume was reserved for assay as a standard, and the remaining labeled cells (approx. 10 mL) were injected into a free-flowing peripheral vein. Samples (5 mL each) were taken from a contralateral vein at time intervals within the first 30 minutes after infusion as well as at 24 hours through a butterfly needle. The samples were counted in a gamma counter to determine  $^{51}Cr$  activity. The activity of the samples from the first 30 minutes was back-extrapolated to determine a T0 activity. The amount of RBCs and the amount of radioactivity infused were determined based on the methods of Moroff and coworkers<sup>6</sup> and the International Committee for Standardization in Hematology.<sup>7</sup> All  $^{51}Cr$  specimens used for survival analysis were counted at the same time and corrected for decay. Areas under the curve (AUC) were calculated by integrating the

slope of  $^{51}\text{Cr}$  as a function of time over the first 24h. Post-transfusion recovery at 24h and AUC were used for correlation to metabolomics and lipidomics measurements.

**Sample processing and metabolite extraction:** A volume of 50  $\mu\text{L}$  of frozen RBC and supernatant aliquots was extracted 1:10 or 1:25, respectively in ice cold extraction solution (methanol:acetonitrile:water 5:3:2 v/v)<sup>8</sup> or pure methanol<sup>9</sup>. Samples were vortexed and insoluble material pelleted, as described,<sup>10,11</sup> prior to further analysis via ultra-high pressure liquid chromatography coupled to mass spectrometry (UHPLC-MS).

**Ultra-High-Pressure Liquid Chromatography-Mass Spectrometry (MS) metabolomics and lipidomics:** The analytical platform employs a Vanquish UHPLC system (Thermo Fisher Scientific, San Jose, CA, USA) coupled online to a Q Exactive mass spectrometer (Thermo Fisher Scientific, San Jose, CA, USA). Sample processing, metabolite extraction and specific methods for metabolomics and lipidomics are presented in the Supplementary Information document.

**Metabolomics:** UHPLC-MS metabolomics analyses were performed using a Vanquish UHPLC system coupled online to a high-resolution Q Exactive mass spectrometer (Thermo Fisher, Bremen, Germany). Samples were resolved over a Kinetex C18 column (2.1x150 mm, 1.7  $\mu\text{m}$ ; Phenomenex, Torrance, CA, USA) at 45°C. A volume of 10  $\mu\text{L}$  of sample extracts was injected into the UHPLC-MS. Each sample was injected and run four times with two different chromatographic and MS conditions as follows: 1) using a 5 minute gradient at 450  $\mu\text{L}/\text{minute}$  from 5-95% B (A: water/0.1% formic acid; B:acetonitrile/0.1% formic acid) and the MS was operated in positive mode and 2) using a 5 minute gradient at 450  $\mu\text{L}/\text{minute}$  from 5-95% B (A: 5% acetonitrile, 95%water/1 mM ammonium acetate; B:95%acetonitrile/5% water, 1 mM ammonium acetate) and the MS was operated in negative ion mode. The UHPLC system was coupled online with a Q Exactive (Thermo, San Jose, CA, USA) scanning in Full MS mode at 70,000 resolution in the 60-900 m/z range, 4 kV spray voltage, 15 sheath gas and 5 auxiliary gas, operated in negative or positive ion mode (separate runs). Stable isotope-labeled internal standards were used as an internal quality control for quantitation, as described.<sup>8</sup>

**Lipidomics:** Samples were resolved over an ACQUITY HSS T3 column (2.1 x 150 mm, 1.8  $\mu\text{m}$  particle size (Waters, MA, USA) using an aqueous phase (A) of 25% acetonitrile and 5 mM ammonium acetate and a mobile phase (B) of 50% isopropanol, 45% acetonitrile and 5 mM ammonium acetate. Samples were eluted from the column using either the solvent gradient: 0-1 min 25% B and 0.3 mL/min; 1-2 min 25-50% B and 0.3 mL/min, 2-8 min 50-90% B and 0.3 mL/min, 8-10 min 90-99% B and 0.3 mL/min, 10-14 min hold at 99% B and 0.3 mL/min, 14-14.1 min 99-25%

B 1 and 0.3 mL/min, 14.1-16.9 min hold at 25% B and 0.4 mL/min, 16.9-17 min hold at 25% B and resume flow of 0.3 mL/min. isocratic elution of 5% B flowed at 250  $\mu$ l/min and 25°C or a gradient from 0- 5% B over 0.5 min; 5-95% B over 0.6 min, hold at 95% B for 1.65 min; 95-5% B over 0.25 min; hold at 5% B for 2 min, flowed at 450  $\mu$ l/min and 35°C<sup>9</sup>. The Q Exactive mass spectrometer (Thermo Fisher Scientific, San Jose, CA, USA) was operated independently in positive or negative ion mode, scanning in Full MS mode (2  $\mu$ scans) from 150 to 1500 m/z at 70,000 resolution, with 4 kV spray voltage, 45 sheath gas, 15 auxiliary gas. When required, dd-MS2 was performed at 17,500 resolution, AGC target = 1e5, maximum IT = 50 ms, and stepped NCE of 25, 35 for positive mode, and 20, 24, and 28 for negative mode.

***Quality control and data processing:*** Calibration was performed prior to analysis using the Pierce™ Positive and Negative Ion Calibration Solutions (Thermo Fisher Scientific). Acquired data was then converted from .raw to .mzXML file format using Mass Matrix (Cleveland, OH, USA). Samples were analyzed in randomized order with a technical mixture injected incrementally to qualify instrument performance. This technical mixture was also injected three times per polarity mode and analyzed with the parameters above, except CID fragmentation was included for unknown compound identification.

***Metabolite assignment and relative quantitation:*** Metabolite assignments were performed using MAVEN (Princeton, NJ, USA),<sup>12</sup> as determined from high-resolution accurate intact mass spectra and isotopic pattern deconvolution, against the KEGG pathway, HMDB, ChEBI, and ChEMBL databases. Assignments were further confirmed against an in house library of unlabeled, <sup>13</sup>C, <sup>15</sup>N isotopes or deuterium-labeled standards (IROATech; Cambridge Isotopes; SPLASH® LIPIDOMIX® Mass Spec Standard, Avanti Lipids).<sup>8,9</sup> Graphs and statistical analyses (either t-test or repeated measures ANOVA), as well as network analyses and circos plots of correlations were prepared with GraphPad Prism 8.0 (GraphPad Software, Inc, La Jolla, CA), GENE E (Broad Institute, Cambridge, MA, USA), the Metscape 2.0 plugin for Cytoscape,<sup>13</sup> MetaboAnalyst 4.0<sup>14</sup> and the OmicsNet plugin.<sup>15</sup>

## References

1. Yoshida T, AuBuchon JP, Tryzelaar L, Foster KY, Bitensky MW. Extended storage of red blood cells under anaerobic conditions. *Vox Sang*. 2007 Jan;92(1):22–31.
2. Nemkov T, Sun K, Reisz JA, Song A, Yoshida T, Dunham A, et al. Hypoxia modulates the purine salvage pathway and decreases red blood cell and supernatant levels of hypoxanthine during refrigerated storage. *Haematologica*. 2018;103(2):361–72.
3. Reisz JA, Wither MJ, Dzieciatkowska M, Nemkov T, Issaian A, Yoshida T, et al. Oxidative modifications of glyceraldehyde 3-phosphate dehydrogenase regulate metabolic reprogramming of stored red blood cells. *Blood*. 2016 22;128(12):e32–42.
4. Dumont LJ, D'Alessandro A, Szczepiorkowski ZM, Yoshida T. CO<sub>2</sub> -dependent metabolic modulation in red blood cells stored under anaerobic conditions. *Transfusion (Paris)*. 2016 Feb;56(2):392–403.
5. Cancelas JA, Dumont LJ, Maes LA, Rugg N, Herschel L, Whitley PH, et al. Additive solution-7 reduces the red blood cell cold storage lesion. *Transfusion (Paris)*. 2015 Mar;55(3):491–8.
6. Moroff G, Sohmer PR, Button LN. Proposed standardization of methods for determining the 24-hour survival of stored red cells. *Transfusion (Paris)*. 1984 Apr;24(2):109–14.
7. Recommended method for radioisotope red-cell survival studies. International Committee for Standardization in Haematology. *Br J Haematol*. 1980 Aug;45(4):659–66.
8. Reisz JA, Nemkov T, Dzieciatkowska M, Culp-Hill R, Stefanoni D, Hill RC, et al. Methylation of protein aspartates and deamidated asparagines as a function of blood bank storage and oxidative stress in human red blood cells. *Transfusion (Paris)*. 2018 Dec;58(12):2978–91.
9. Reisz JA, Zheng C, D'Alessandro A, Nemkov T. Untargeted and Semi-targeted Lipid Analysis of Biological Samples Using Mass Spectrometry-Based Metabolomics. *Methods Mol Biol Clifton NJ*. 2019;1978:121–35.
10. Nemkov T, Hansen KC, Dumont LJ, D'Alessandro A. Metabolomics in transfusion medicine. *Transfusion (Paris)*. 2016 Apr;56(4):980–93.
11. D'Alessandro A, Nemkov T, Yoshida T, Bordbar A, Palsson BO, Hansen KC. Citrate metabolism in red blood cells stored in additive solution-3. *Transfusion (Paris)*. 2017 Feb;57(2):325–36.
12. Melamud E, Vastag L, Rabinowitz JD. Metabolomic Analysis and Visualization Engine for LC–MS Data. *Anal Chem*. 2010 Dec;82(23):9818–26.
13. Karnovsky A, Weymouth T, Hull T, Tarcea VG, Scardoni G, Laudanna C, et al. Metscape 2 bioinformatics tool for the analysis and visualization of metabolomics and gene expression data. *Bioinforma Oxf Engl*. 2012 Feb 1;28(3):373–80.
14. Chong J, Soufan O, Li C, Caraus I, Li S, Bourque G, et al. MetaboAnalyst 4.0: towards more transparent and integrative metabolomics analysis. *Nucleic Acids Res*. 2018 Jul 2;46(W1):W486–94.
15. Zhou G, Xia J. Using OmicsNet for Network Integration and 3D Visualization. *Curr Protoc Bioinforma*. 2019;65(1):e69.

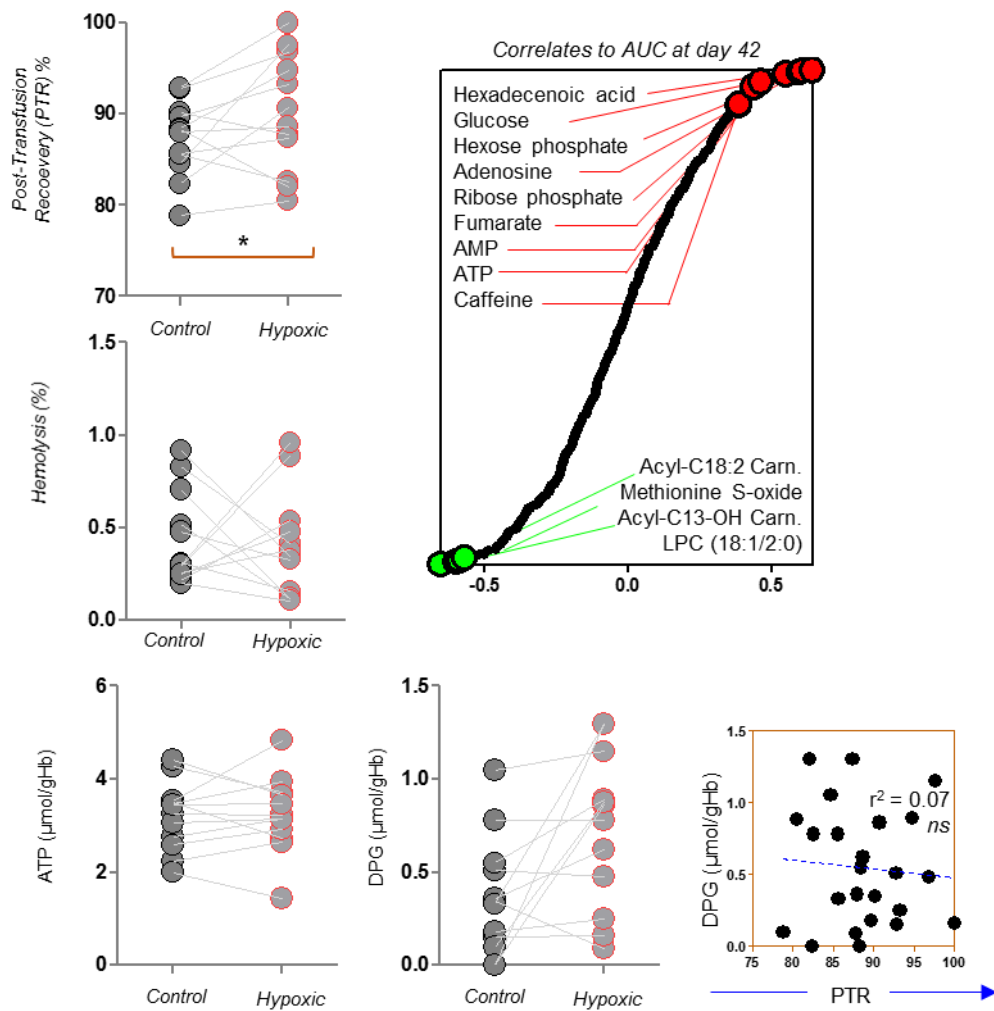

**SUPPLEMENTARY FIGURE 1 – Line plots of end of storage PTR and hemolysis of paired control (normoxic) and hypoxic RBC units. On the right hand side, metabolic correlates to AUC of PTR at day 42 for combined normoxic and hypoxic units.**

Suppl Figure 2 - HCA of normoxic and hypoxic RBCs at storage day 0, 21 and 42

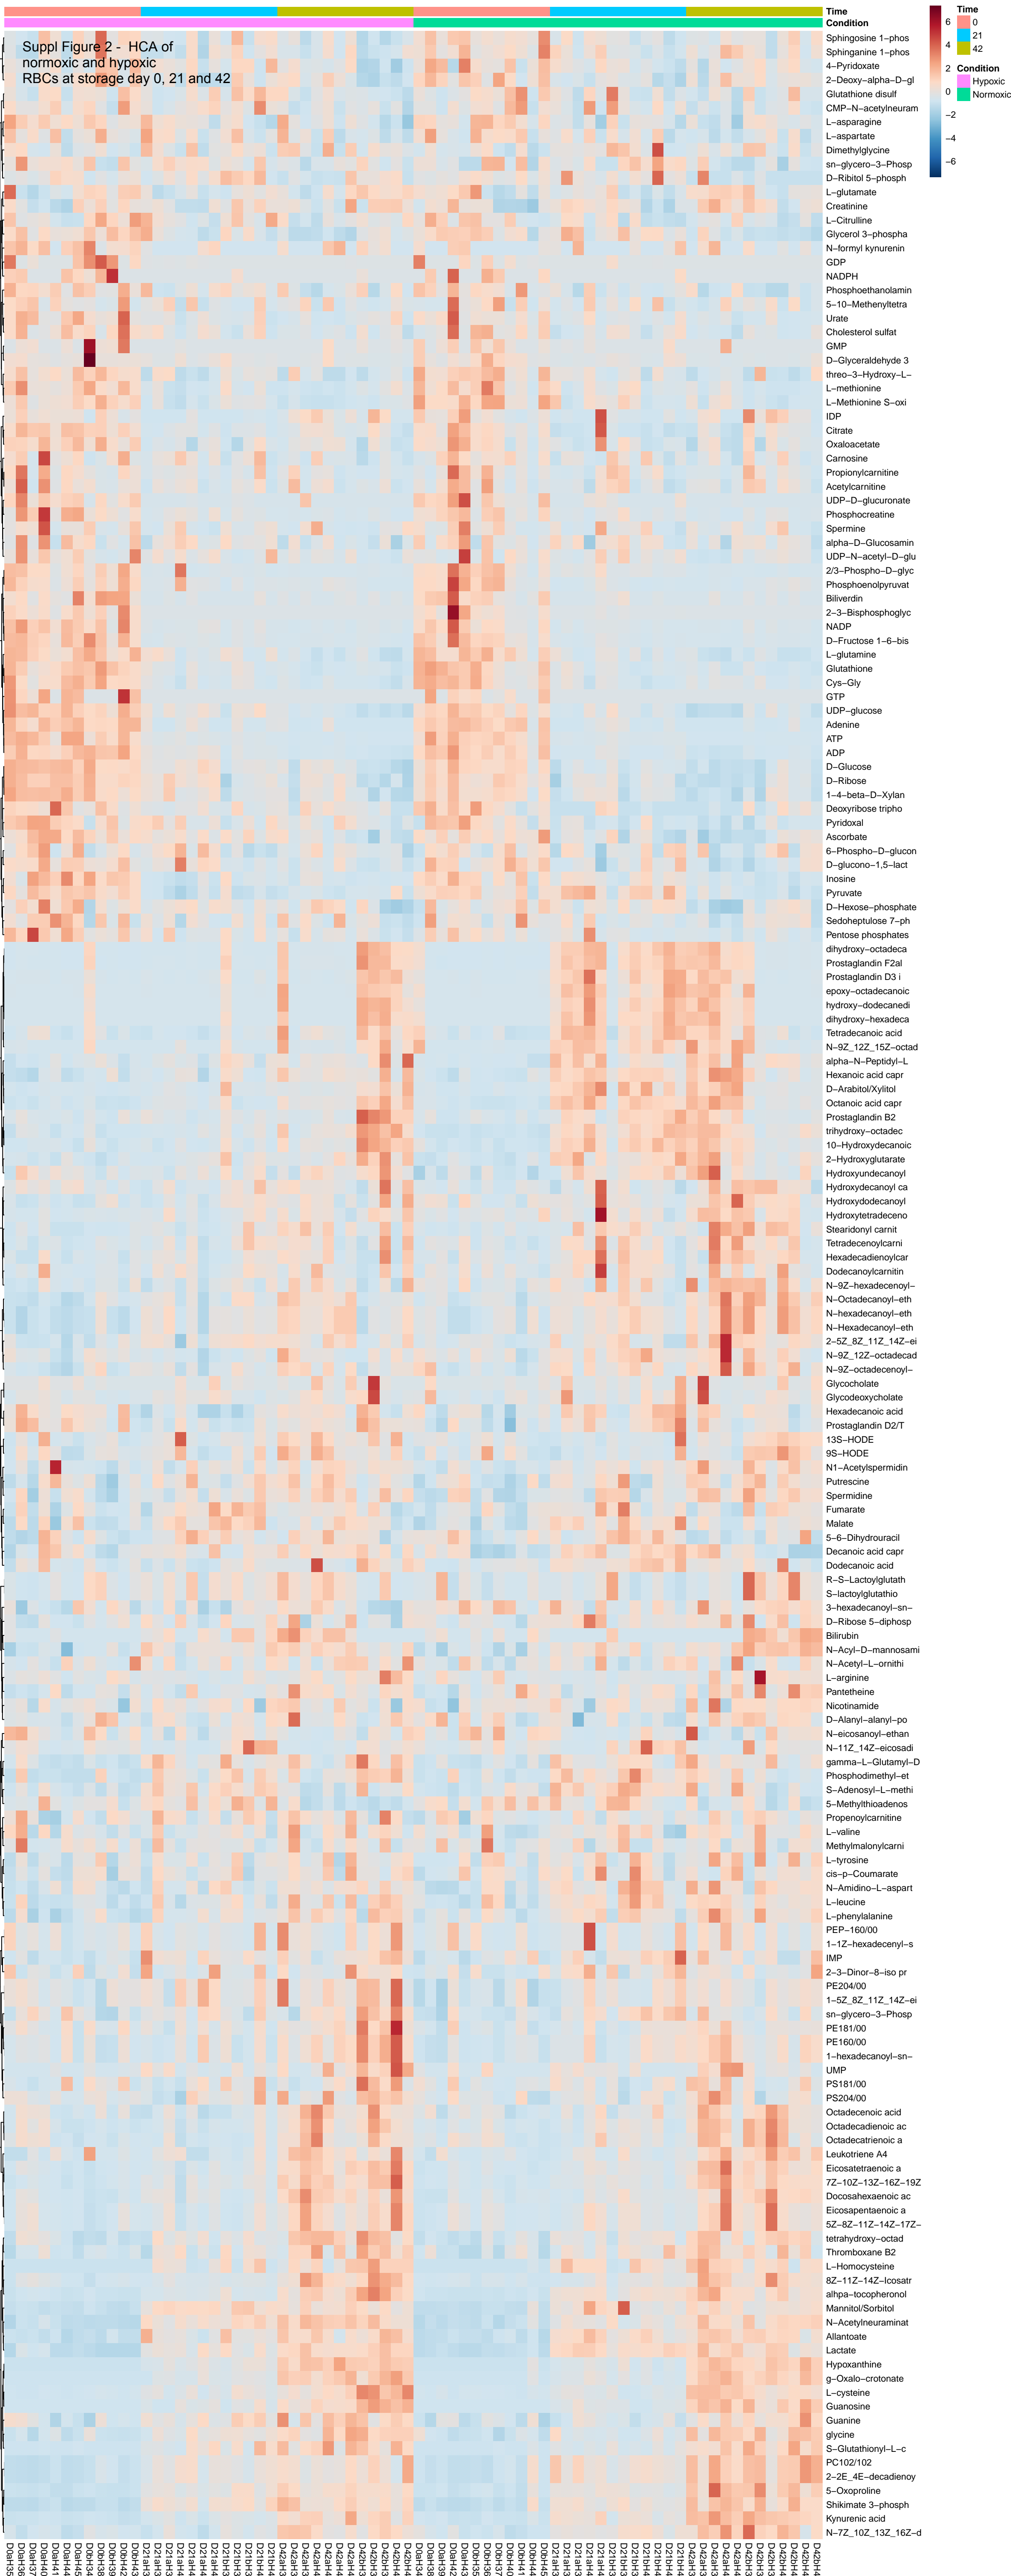

- Time**
- 0
  - 21
  - 42
- Condition**
- Hypoxic
  - Normoxic
- Metabolites:**
- Sphingosine 1-phos
  - Sphinganine 1-phos
  - 4-Pyridoxate
  - 2-Deoxy-alpha-D-gl
  - Glutathione disulf
  - CMP-N-acetylneuram
  - L-asparagine
  - L-aspartate
  - Dimethylglycine
  - sn-glycero-3-Phosp
  - D-Ribitol 5-phosph
  - L-glutamate
  - Creatinine
  - L-Citrulline
  - Glycerol 3-phospha
  - N-formyl kynurenin
  - GDP
  - NADPH
  - Phosphoethanolamin
  - 5-10-Methenyltetra
  - Urate
  - Cholesterol sulfat
  - GMP
  - D-Glyceraldehyde 3
  - threo-3-Hydroxy-L-
  - L-methionine
  - L-Methionine S-oxi
  - IDP
  - Citrate
  - Oxaloacetate
  - Carnosine
  - Propionylcarnitine
  - Acetylarnitine
  - UDP-D-glucuronate
  - Phosphocreatine
  - Spermine
  - alpha-D-Glucosamin
  - UDP-N-acetyl-D-glu
  - 2/3-Phospho-D-glyc
  - Phosphoenolpyruvat
  - Biliverdin
  - 2-3-Bisphosphoglyc
  - NADP
  - D-Fructose 1-6-bis
  - L-glutamine
  - Glutathione
  - Cys-Gly
  - GTP
  - UDP-glucose
  - Adenine
  - ATP
  - ADP
  - D-Glucose
  - D-Ribose
  - 1-4-beta-D-Xylan
  - Deoxyribose tripho
  - Pyridoxal
  - Ascorbate
  - 6-Phospho-D-glucon
  - D-glucono-1,5-lact
  - Inosine
  - Pyruvate
  - D-Hexose-phosphate
  - Sedoheptulose 7-ph
  - Pentose phosphates
  - dihydroxy-octadeca
  - Prostaglandin F2a
  - Prostaglandin D3 i
  - epoxy-octadecanoic
  - hydroxy-dodecanedi
  - dihydroxy-hexadeca
  - Tetradecanoic acid
  - N-9Z\_12Z\_15Z-octad
  - alpha-N-Peptidyl-L
  - Hexanoic acid capr
  - D-Arabitol/Xylitol
  - Octanoic acid capr
  - Prostaglandin B2
  - trihydroxy-octadec
  - 10-Hydroxydodecanoic
  - 2-Hydroxyglutarate
  - Hydroxyundecanoyl
  - Hydroxydodecanoyl
  - Hydroxytetradeceno
  - Stearidonyl carnit
  - Tetradecenoylcarni
  - Hexadecadienoylcar
  - Dodecanoylcarnitin
  - N-9Z-hexadecenoyl-
  - N-Octadecanoyl-eth
  - N-hexadecanoyl-eth
  - N-Hexadecanoyl-eth
  - 2-5Z\_8Z\_11Z\_14Z-ei
  - N-9Z\_12Z-octadecad
  - N-9Z-octadecenoyl-
  - Glycocholate
  - Glycodeoxycholate
  - Hexadecanoic acid
  - Prostaglandin D2/T
  - 13S-HODE
  - 9S-HODE
  - N1-Acetylspermidin
  - Putrescine
  - Spermidine
  - Fumarate
  - Malate
  - 5-6-Dihydrouracil
  - Decanoic acid capr
  - Dodecanoic acid
  - R-S-Lactoylglutath
  - S-lactoylglutathio
  - 3-hexadecanoyl-sn-
  - D-Ribose 5-diphosp
  - Bilirubin
  - N-Acyl-D-mannosami
  - N-Acetyl-L-ornithi
  - L-arginine
  - Pantetheine
  - Nicotinamide
  - D-Alanyl-alanyl-po
  - N-eicosanoyl-ethan
  - N-11Z\_14Z-eicosadi
  - gamma-L-Glutamyl-D
  - Phosphodimethyl-et
  - S-Adenosyl-L-methi
  - 5-Methylthioadenos
  - Propenoylcarnitine
  - L-valine
  - Methylmalonylcarni
  - L-tyrosine
  - cis-p-Coumarate
  - N-Amidino-L-aspart
  - L-leucine
  - L-phenylalanine
  - PEP-160/00
  - 1-1Z-hexadecenyl-s
  - IMP
  - 2-3-Dinor-8-iso pr
  - PE204/00
  - 1-5Z\_8Z\_11Z\_14Z-ei
  - sn-glycero-3-Phosp
  - PE181/00
  - PE160/00
  - 1-hexadecanoyl-sn-
  - UMP
  - PS181/00
  - PS204/00
  - Octadecenoic acid
  - Octadecadienoic ac
  - Octadecatrienoic a
  - Leukotriene A4
  - Eicosatetraenoic a
  - 7Z-10Z-13Z-16Z-19Z
  - Docosahexaenoic ac
  - Eicosapentaenoic a
  - 5Z-8Z-11Z-14Z-17Z-
  - tetrahydroxy-octad
  - Thromboxane B2
  - L-Homocysteine
  - 8Z-11Z-14Z-Icosatr
  - alpha-tocopheronol
  - Mannitol/Sorbitol
  - N-Acetylneuraminat
  - Allantoate
  - Lactate
  - Hypoxanthine
  - g-Oxalo-crotonate
  - L-cysteine
  - Guanosine
  - Guanine
  - glycine
  - S-Glutathionyl-L-c
  - PC102/102
  - 2-2E\_4E-decadieny
  - 5-Oxoproline
  - Shikimate 3-phosph
  - Kynurenic acid
  - N-7Z\_10Z\_13Z\_16Z-d

Suppl Figure 3 - HCA of supernaants from normoxic and hypoxic RBCs stored for 0, 21 and 42 days

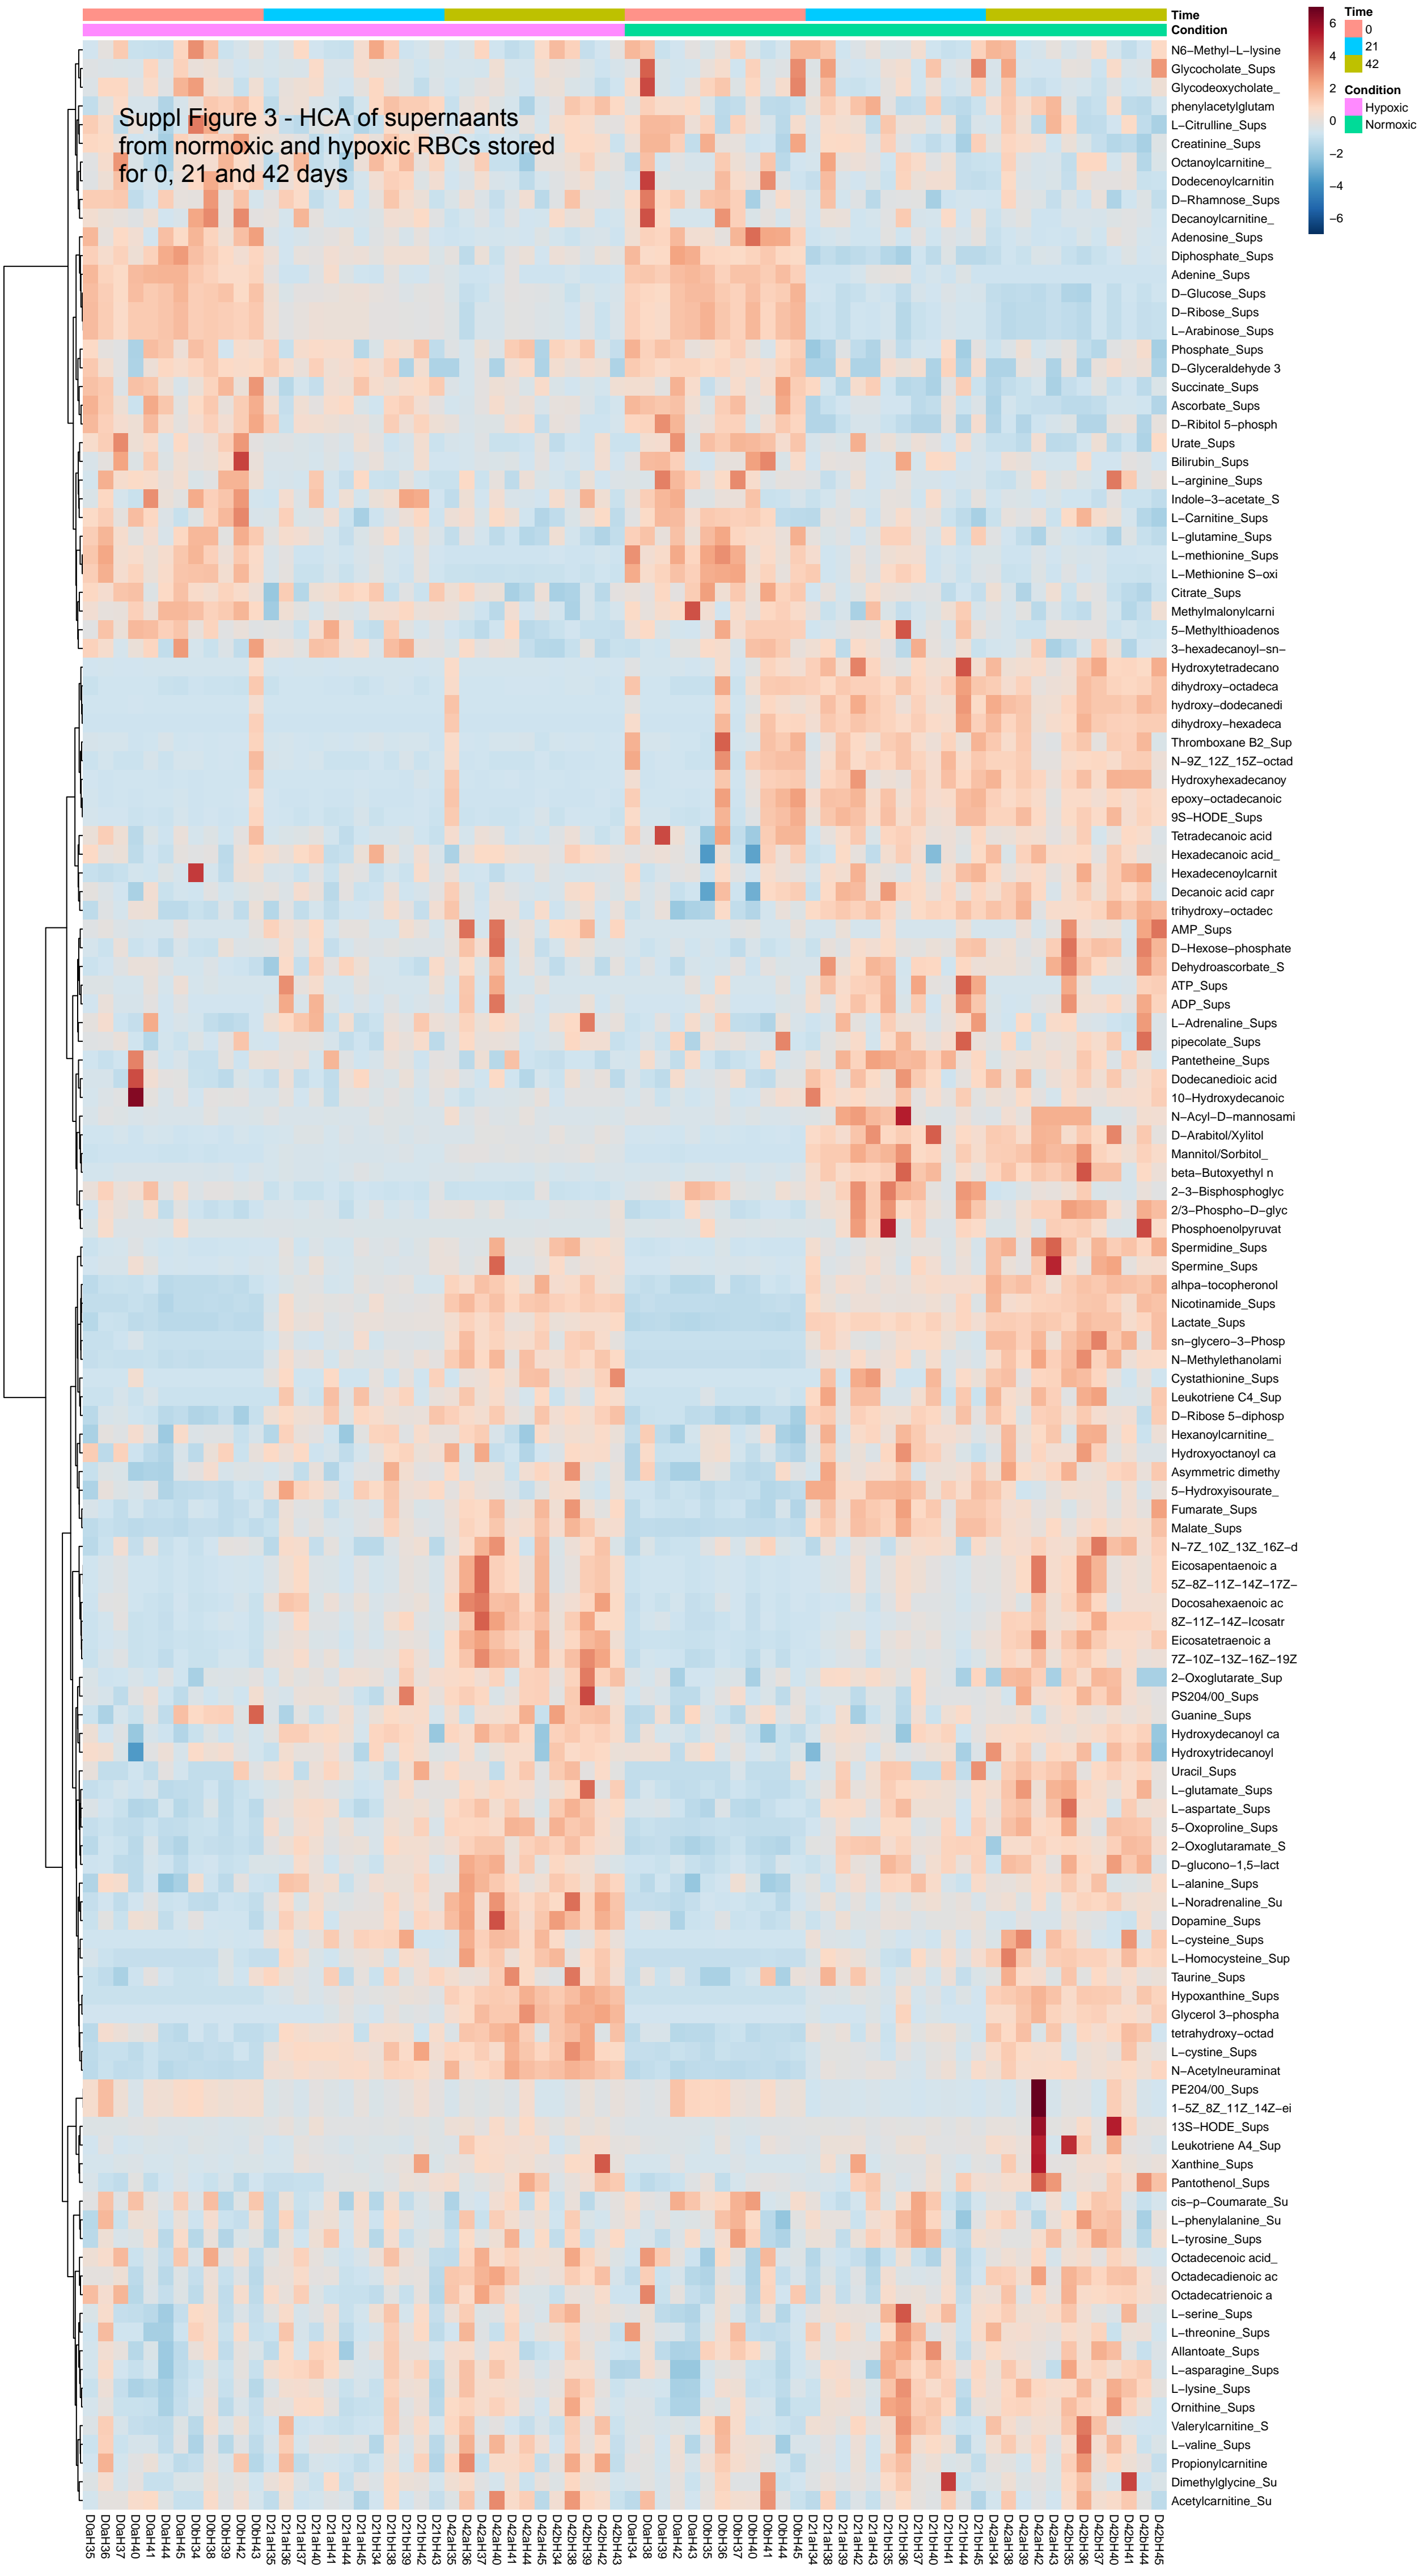

Supplement: NIHMS1648603-supplement-Suppl_Methods.pdf [file NIHMS1648603-supplement-Suppl_Methods.pdf]
